# Supplementary material for: Establishment of a Molecular Tumor Board (MTB) and Uptake of Recommendations in a Community Setting
Source: PubMed Central journal article supplement (PMC7711773; doi:10.3390/jpm10040252), 2020-11-27
Supplement: jpm-10-00252-s001.pdf [file jpm-10-00252-s001.pdf]

## SUPPLEMENTARY MATERIAL

The criteria for clinically-actionable mutations in order of decreasing clinical validity were:

- Approved drug for the alteration with a well-defined biomarker in that disease
- Approved drug for the alteration, which was well defined in another disease (ie, vemurafenib approved for BRAF V600E mutation in melanoma, applied to non-small cell lung cancer)
- Evidence for a benefit of a drug with well-defined biomarkers from reported clinical trials in a specific disease
- A drug was being studied in a clinical trial in one disease or multiple diseases linked to a biomarker
- A drug was available with a case report of response (n = 1)
- A drug was available that had demonstrated pre-clinical activity against that alteration in a specific disease.

Supplementary Table 1. Caris MI<sup>®</sup> gene panel

| Next-Generation Sequencing – Genomic Stability Testing (DNA)                              |              |                  |          |                 |                                |                 |          |                           |          |
|-------------------------------------------------------------------------------------------|--------------|------------------|----------|-----------------|--------------------------------|-----------------|----------|---------------------------|----------|
| Microsatellite Instability (MSI)                                                          |              |                  |          |                 | Tumor Mutational Burden (TMB)* |                 |          |                           |          |
| Next-Generation Sequencing – Point Mutations and Indels (DNA)                             |              |                  |          |                 |                                |                 |          |                           |          |
| ABI1                                                                                      | BRD4         | CRLF2            | FOXO4    | HOXC11          | KLF4                           | MUC1            | PAK3     | RHOH                      | TAL2     |
| ABL1                                                                                      | BTG1         | DDI2             | FSTL3    | HOXC13          | KLK2                           | MUTYH           | PATZ1    | RNF213                    | TBL1XR1  |
| ACKR3                                                                                     | BTK          | DDIT3            | GATA1    | HOXD11          | LASP1                          | MYCL (MYCL1)    | PAX8     | RPL10                     | TCEA1    |
| AKT1                                                                                      | CTSor65      | DNM2             | GATA2    | HOXD13          | LMO1                           | NBN             | PD4DIP   | SEPT5                     | TCL1A    |
| AMER1 (FAM123B)                                                                           | CBLC         | DNMT3A           | GNA11    | HRAS            | LMO2                           | NDRG1           | PHF6     | SEPT6                     | TERT     |
| AR                                                                                        | CD79B        | EIF4A2           | GPC3     | KBK1            | MAFB                           | NKX2-1          | PHOX2B   | SFPQ                      | TFEB     |
| ARAF                                                                                      | CDH1         | ELF4             | HEY1     | INHBA           | MAX                            | NONO            | PIK3CG   | SLC45A3                   | TFPI     |
| ATP2B3                                                                                    | CDK12        | ELN              | HIST1H3B | IRS2            | MECOM                          | NOTCH1          | PLAG1    | SMARCA4                   | THRSP3   |
| ATRX                                                                                      | CDKN2B       | ERCC1            | HISTH4H  | JUN             | MED12                          | NRAS            | PMS1     | SOCS1                     | TLX3     |
| BCL11B                                                                                    | CDKN2C       | ETV4             | HLF      | KAT5A (MYST3)   | MKL1                           | NUMA1           | POU5F1   | SOX2                      | TMPRSS2  |
| BCL2                                                                                      | CEBPA        | FAM66C           | HMGNZP46 | KAT5B           | MLLT11                         | NUTM2B          | PPP2R1A  | SPOP                      | UBR5     |
| BCL2L2                                                                                    | CHCHD7       | FANCF            | HNF1A    | KCNJ5           | MNI                            | OLIG2           | PRF1     | SRC                       | VHL      |
| BCOR                                                                                      | CNOT3        | FEV              | HDKA11   | KDM5C           | MPL                            | OMD             | PRKDC    | SSX1                      | WAS      |
| BCORL1                                                                                    | COL1A1       | FOXL2            | HDKA13   | KDM6A           | MSN                            | P2RY8           | RAD21    | STAG2                     | ZBTB16   |
| BRD3                                                                                      | COX5C        | FOXO3            | HDKA9    | KDSR            | MTCF1                          | RAFAH1B2        | RECQL4   | TAL1                      | ZRSR2    |
| Next-Generation Sequencing – Point Mutations, Indels and Copy Number Alterations* (DNA)   |              |                  |          |                 |                                |                 |          |                           |          |
| ABL2                                                                                      | BRCA1        | CREBBL1          | ETV1     | GAS7            | KMT2A (MLL1)                   | MYCN            | PER1     | RUNX1                     | TFEB     |
| ACSL3                                                                                     | BRCA2        | CREBBL2          | ETV5     | GATA3           | KMT2C (MLL2)                   | MYD88           | PICALM   | RUNX1T1                   | TFG      |
| ACSL6                                                                                     | BRIP1        | CREBBP           | ETV6     | GID4 (CT7orf39) | KMT2D (MLL2)                   | MYH11           | PIK3CA   | SBD5                      | TFRC     |
| ADGRA2                                                                                    | BUB1B        | CRKL             | EWSR1    | GMP5            | MKL1                           | MYH9            | PIK3R1   | SDC4                      | TGFB2    |
| AFDN                                                                                      | CACNA1D      | CRIC1            | EXT1     | GNA13           | KRAS                           | NACA            | PIK3R2   | SDHAF2                    | TLX1     |
| AFF1                                                                                      | CAUR         | CRIC3            | EXT2     | GNAQ            | KTN1                           | NCKIPSD         | PIM1     | SDHB                      | TNFAIP3  |
| AFF3                                                                                      | CAMTA1       | CSF1R            | EZH2     | GNAS            | LCK                            | NCOA1           | PML      | SDHC                      | TNFRSF14 |
| AFF4                                                                                      | CANT1        | CSF3R            | EZR      | GOLGA5          | LCP1                           | NCOA2           | PMS2     | SDHD                      | TNFRSF17 |
| AKAP9                                                                                     | CARD11       | CTCF             | FANCA    | GOPC            | LGR5                           | NCOA4           | POLE     | SEPT9                     | TOP1     |
| AKT2                                                                                      | CARS         | CTLA4            | FANCC    | GPHN            | LHFPL6                         | NF1             | POT1     | SET                       | TP53     |
| AKT3                                                                                      | CASP8        | CTNNA1           | FANCD2   | GRIIN2A         | LIFR                           | NF2             | POU2AF1  | SETBP1                    | TPM3     |
| ALDH2                                                                                     | CBFA2T3      | CTNNB1           | FANCE    | GSK3B           | LPP                            | NFE2L2          | PPARG    | SETD2                     | TPM4     |
| ALK                                                                                       | CBFB         | CYLD             | FANCG    | H3F3A           | LRG3                           | NFIB            | PRCC     | SFBT1                     | TPR      |
| APC                                                                                       | CEB1         | CYP2D6           | FANCL    | H3F3B           | LSP1B                          | NFKB2           | PRDM1    | SH2B3                     | TRAF7    |
| ARFRP1                                                                                    | CEBL         | DAXX             | FAS      | HERPUD1         | LYL1                           | NFKBIA          | PRDM16   | SH3GL1                    | TRM26    |
| ARHGAP26                                                                                  | CDC6         | DDR2             | FBXO11   | HGF             | MAF                            | NIN             | PRKAR1A  | SLC34A2                   | TRM27    |
| ARHGAP12                                                                                  | CONB1P1      | DDX10            | FBXW7    | HIP1            | MALT1                          | NOTCH2          | PBRX1    | SMAD2                     | TRM33    |
| ARID1A                                                                                    | COND1        | DDX5             | FGF4     | HMGAI           | MAML2                          | NPM1            | PSIP1    | SMAD4                     | TRIP11   |
| ARID2                                                                                     | COND2        | DDX6             | FGF10    | HMGAI2          | MAP2K1 (MEK1)                  | NR4A3           | PTCH1    | SMARCB1                   | TRRAP    |
| ARNT                                                                                      | COND3        | DEK              | FGF14    | HNRNPA2B1       | MAP2K2 (MEK2)                  | NSD1            | PTEN     | SMARCE1                   | TSC1     |
| ASPSCR1                                                                                   | CDNE1        | DKERC1           | FGF19    | HOOK3           | MAP2K4                         | NSD2            | PTPN11   | SMO                       | TSC2     |
| ASK1L1                                                                                    | CD274 (PDL1) | DOT1L            | FGF23    | HSP90AA1        | MAP3K1                         | NSD3            | PTPRC    | SNX29                     | TSHR     |
| ATF1                                                                                      | CD74         | EBF1             | FGF3     | HSP90AB1        | MCL1                           | NTS2            | RABEP1   | SOX10                     | TTL      |
| ATIC                                                                                      | CD79A        | ECT2L            | FGF4     | IDH1            | MDM2                           | NTRK1           | RAC1     | SPECC1                    | UZAF1    |
| ATM                                                                                       | CD73         | EGFR             | FGF6     | IDH2            | MDM4                           | NTRK2           | RAD50    | SPEN                      | USP6     |
| ATP1A1                                                                                    | CDH11        | ELK4             | FGFR1    | IGF1R           | MDS2                           | NTRK3           | RAD51    | SRGA3                     | VEGFA    |
| ATR                                                                                       | CDK4         | ELL              | FGFR1OP  | IKZF1           | MEF2B                          | NUP214          | RAD51B   | SRSF2                     | VEGFB    |
| AURKA                                                                                     | CDK6         | EML4             | FGFR2    | IL2             | MEN1                           | NUP93           | RAF1     | SRSF3                     | VIT1A    |
| AURKB                                                                                     | CDK8         | EMSY             | FGFR3    | IL21R           | MET                            | NUP98           | RALGDS   | SS18                      | WDCP     |
| AXIN1                                                                                     | CDKN1B       | EP300            | FGFR4    | IL6ST           | MIF                            | NUTM1           | RANBP17  | SS18L1                    | WIF1     |
| AXL                                                                                       | CDKN2A       | EPHA3            | FH       | IL7R            | MLF1                           | PALB2           | RAF1GDS1 | STAT3                     | WSP3     |
| BAP1                                                                                      | CDK2         | EPHA5            | FHIT     | IRF4            | MLH1                           | PAX3            | RARA     | STAT4                     | WRN      |
| BARB1                                                                                     | CHEK1        | EPHB1            | FP1L1    | JTK             | MLL1                           | PAX5            | RB1      | STAT5B                    | WT1      |
| BCL10                                                                                     | CHEK2        | EP515            | FLCN     | JAK1            | MLL1T10                        | PAX7            | RBM15    | STIL                      | WWTR1    |
| BCL11A                                                                                    | CHIC2        | ERBB2 (HER2/NEU) | FUJ1     | JAK2            | MLL1T3                         | PBRM1           | REL      | STK11                     | XPA      |
| BCL2L11                                                                                   | CHN1         | ERBB3 (HER3)     | FUJ1     | JAK3            | MLL1T6                         | PBX1            | RET      | SUJ1                      | XPC      |
| BCL3                                                                                      | CIC          | ERBB4 (HER4)     | FLT3     | JAZF1           | MNXC1                          | PCM1            | RICTOR   | SUZ12                     | XPO1     |
| BCL6                                                                                      | CIT4         | ERC1             | FLI4     | KDM5A           | MRE11                          | PCSK7           | RM2      | SYK                       | YWHAE    |
| BCL7A                                                                                     | CLP1         | ERCC2            | FNBP1    | KDR (VEGFR2)    | MSH2                           | POCD1 (PD1)     | RNF43    | TAF15                     | ZMYM2    |
| BCL9                                                                                      | CLTC         | ERCC3            | FOXA1    | KEAP1           | MSH6                           | POCD1LG2 (PDL2) | ROS1     | TCF12                     | ZNF217   |
| BCR                                                                                       | CLTC1        | ERCC4            | FOXD1    | NAA1549         | MSI2                           | PDGFB           | RPL22    | TCF3                      | ZNF331   |
| BIRC3                                                                                     | CNBP         | ERCC5            | FOXP1    | NF3B            | MTOR                           | PDGFRA          | RPL5     | TCF7L2                    | ZNF384   |
| BLM                                                                                       | CNTRL        | ERG              | FUSP1    | NT              | MYB                            | PDGFRB          | RPN1     | TE11                      | ZNF521   |
| BMPRIA                                                                                    | COBPI        | ESR1             | FUS      | KLHL6           | MYC                            | PDK1            | RPTOR    | TE2                       | ZNF703   |
| BRAF                                                                                      | CREB1        |                  |          |                 |                                |                 |          |                           |          |
| Whole Transcriptome Sequencing – Genes most commonly associated with cancer listed below. |              |                  |          |                 |                                |                 |          |                           |          |
| Fusions (RNA)                                                                             |              |                  |          |                 |                                |                 |          | Variant Transcripts (RNA) |          |
| ABL                                                                                       | BRD3         | FGFR3            | INSR     | MYB             | NUMBL                          | PRKCA           | RSPO3    | AR-V7                     |          |
| AKT3                                                                                      | BRD4         | ERG              | MAML2    | NOTCH1          | NUTM1                          | PRKCB           | TERT     |                           |          |
| ALK                                                                                       | EGFR         | ESR1             | MAST1    | NOTCH2          | PDGFRA                         | RAF1            | TFE3     | EGFR vII                  |          |
| ARHGAP26                                                                                  | EWSR1        | ETV1             | MAST2    | NRG1            | PDGFRB                         | RELA            | TFEB     |                           |          |
| AXL                                                                                       | FGR          | ETV4             | MET      | NTRK1           | PIK3CA                         | RET             | THADA    |                           |          |
| BCR                                                                                       | FGFR1        | ETV5             | MSMB     | NTRK2           | PN1                            | ROS1            | TMPRSS2  | MET Exon 14 Skipping      |          |
| BRAF                                                                                      | FGFR2        | ETV6             | MUSK     | NTRK3           | PPARG                          | RSPO2           |          |                           |          |

**Supplementary Fig 1.** MTB recommendations for clinical trial enrollment and resulting patient management.
